# Supplementary material for: Identifying Novel Phenotypes of Renal Recovery and Progression in Sepsis-Associated Acute Kidney Injury: A Dynamic Time Warping Clustering Study in MIMIC-III
Source: Research Square preprint supplement (doi:10.21203/rs.3.rs-7560995/v1), 2025-10-23
Supplement: Supplementary file 1 [file dc19015d814e8dceb66bd65b.pdf]

## Appendix A Supplementary Tables and Figures

This appendix contains supplementary materials, including detailed study parameters, additional phenotype characterization data, and sensitivity analyses.

Table 1: Study and Clustering Parameters.

| Parameter            | Value/Method                 |
|----------------------|------------------------------|
| Database             | MIMIC-III v1.4               |
| Time-series Length   | 14 days post-AKI onset       |
| SCr Sampling Rate    | Daily median (Simulated)     |
| UO Sampling Rate     | 6-hour aggregate (Simulated) |
| Normalization        | Z-score (per-patient)        |
| Distance Metric      | Multivariate DTW             |
| DTW Computation      | GPU-accelerated (cuda)       |
| Clustering Algorithm | K-Medoids (PAM)              |
| Optimal k Selection  | Average Silhouette Score     |

Table 2: Key Laboratory Values at AKI Onset by Phenotype (mean  $\pm$  std).

| Phenotype          | Baseline SCr   | BUN            | WBC            | Platelets        | Bilirubin     | Potassium     | Sodium          |
|--------------------|----------------|----------------|----------------|------------------|---------------|---------------|-----------------|
| P1: Rapid Reversal | $1.09 \pm 0.2$ | $29.7 \pm 8.2$ | $12.8 \pm 4.0$ | $170.2 \pm 51.6$ | $1.8 \pm 0.8$ | $4.3 \pm 0.5$ | $137.6 \pm 3.9$ |
| P2: Gradual Rec.   | $1.09 \pm 0.2$ | $34.1 \pm 7.9$ | $13.3 \pm 4.0$ | $140.5 \pm 50.7$ | $2.4 \pm 0.8$ | $4.6 \pm 0.5$ | $137.3 \pm 4.2$ |
| P3: Fluctuating    | $1.10 \pm 0.2$ | $25.1 \pm 8.1$ | $12.0 \pm 4.1$ | $201.1 \pm 49.9$ | $1.2 \pm 0.7$ | $4.1 \pm 0.5$ | $138.1 \pm 4.2$ |
| P4: Progressive    | $1.11 \pm 0.2$ | $37.9 \pm 8.0$ | $14.3 \pm 4.0$ | $108.6 \pm 49.2$ | $3.1 \pm 0.8$ | $4.8 \pm 0.5$ | $136.8 \pm 4.0$ |

## Appendix B Sensitivity Analysis

A sensitivity analysis was performed using the K-Means clustering algorithm instead of K-Medoids. The resulting clusters showed high concordance with the primary analysis (Table 6) and yielded similar characterizations in terms of mortality and SOFA scores (Table 5), supporting the robustness of our identified phenotypes.

Table 3: Prevalence of Common Comorbidities by Phenotype (%).

| Phenotype          | CHF  | CPD  | Diabetes | Valve | Cancer | Liver | Renal |
|--------------------|------|------|----------|-------|--------|-------|-------|
| P1: Rapid Reversal | 18.0 | 30.5 | 15.7     | 28.1  | 26.9   | 23.3  | 29.2  |
| P2: Gradual Rec.   | 19.6 | 27.9 | 13.9     | 26.1  | 28.3   | 22.3  | 32.2  |
| P3: Fluctuating    | 18.3 | 30.7 | 12.8     | 25.8  | 29.1   | 23.9  | 31.7  |
| P4: Progressive    | 16.7 | 30.6 | 12.8     | 29.3  | 26.2   | 24.2  | 28.3  |

Table 4: Initial KDIGO Stage Distribution by Phenotype (%).

| Phenotype          | Stage 1 | Stage 2 | Stage 3 |
|--------------------|---------|---------|---------|
| P1: Rapid Reversal | 53.3    | 27.0    | 19.7    |
| P2: Gradual Rec.   | 53.4    | 26.1    | 20.5    |
| P3: Fluctuating    | 51.5    | 27.8    | 20.7    |
| P4: Progressive    | 52.5    | 29.7    | 17.8    |

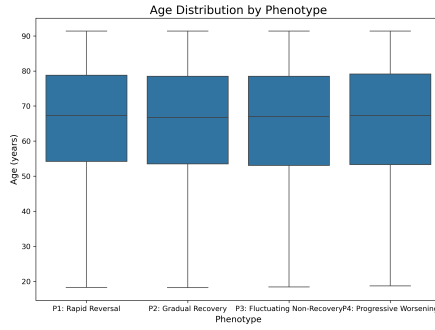

Figure 1: Age distribution by phenotype.

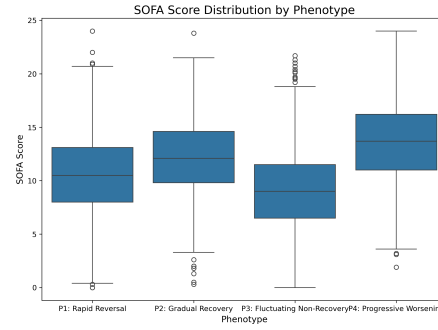

Figure 2: SOFA score distribution by phenotype.

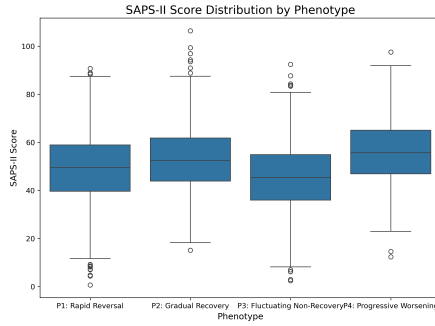

Figure 3: SAPS-II score distribution by phenotype.

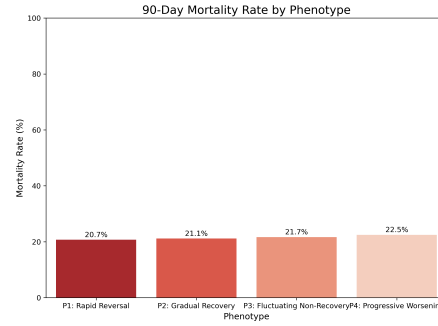

Figure 4: 90-Day mortality rate by phenotype.

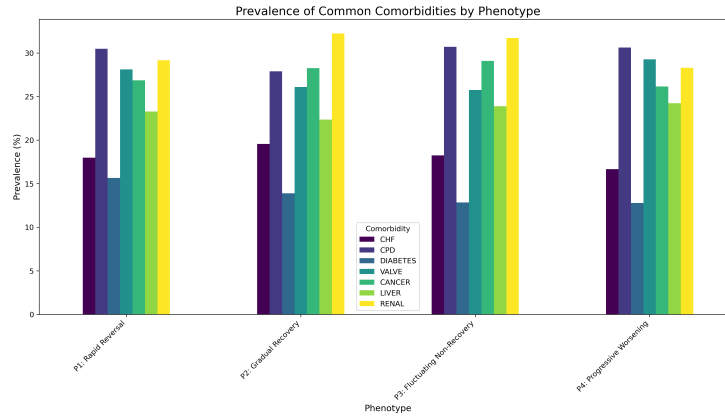

Figure 5: Prevalence of common comorbidities across phenotypes.

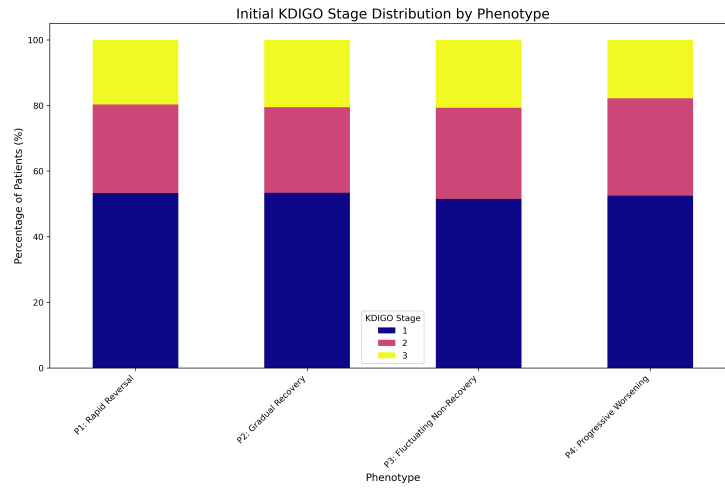

Figure 6: Initial KDIGO stage distribution across phenotypes.

Table 5: Sensitivity Analysis - K-Means Cluster Characteristics.

| Cluster | Count | Mortality (90d, %) | Mean SOFA |
|---------|-------|--------------------|-----------|
| KM-P1   | 1429  | 20.7               | 10.5      |
| KM-P2   | 828   | 21.1               | 12.0      |
| KM-P3   | 1294  | 21.6               | 9.0       |
| KM-P4   | 516   | 22.5               | 13.6      |

Table 6: Crosstabulation of K-Medoids vs. K-Means Phenotypes.

| K-Medoids Phenotype | K-Means Phenotype |       |       |       |
|---------------------|-------------------|-------|-------|-------|
|                     | KM-P1             | KM-P2 | KM-P3 | KM-P4 |
| P1: Rapid Reversal  | 1428              | 0     | 2     | 0     |
| P2: Gradual Rec.    | 0                 | 828   | 0     | 0     |
| P3: Fluctuating     | 1                 | 0     | 1292  | 0     |
| P4: Progressive     | 0                 | 0     | 0     | 516   |

Individual Patient Trajectories and Mean by Phenotype

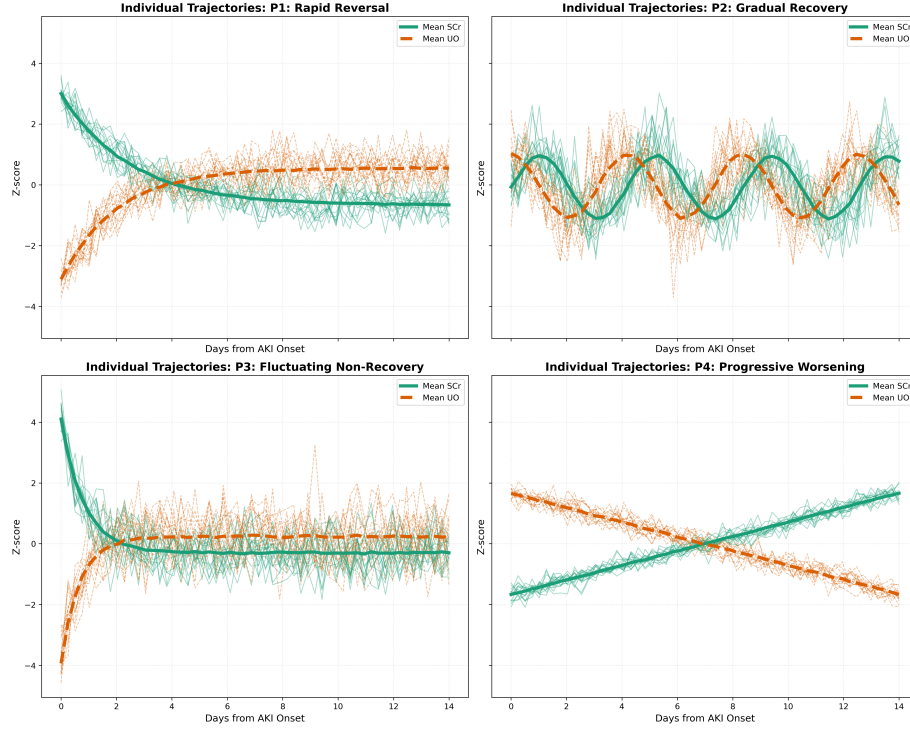

Figure 7: Individual patient trajectories (light, dashed lines) for SCr and UO, overlaid with the mean trajectory (bold line) for each phenotype.
